# Supplementary material
Source: PubMed Central journal article supplement (PMC5528177)
Supplement: NIHMS883481-supplement-1.pdf [file NIHMS883481-supplement-1.pdf]

# Supplemental information

## **Table of contents:**

I. Supplemental Figures and Figure Legends

II. Supplemental Experimental Procedures

III. Associated References

IV. Table S2

# Figure S1

**A**
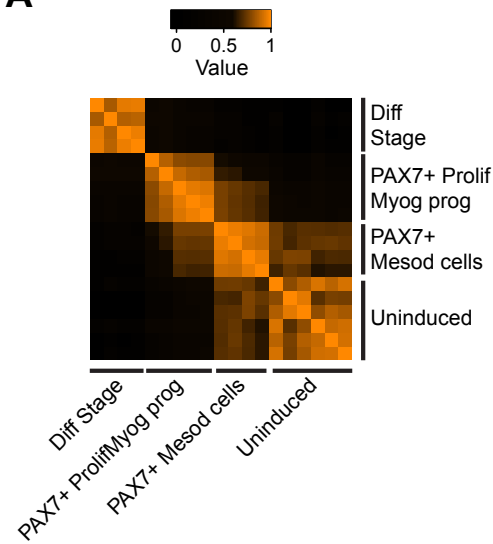
**B**
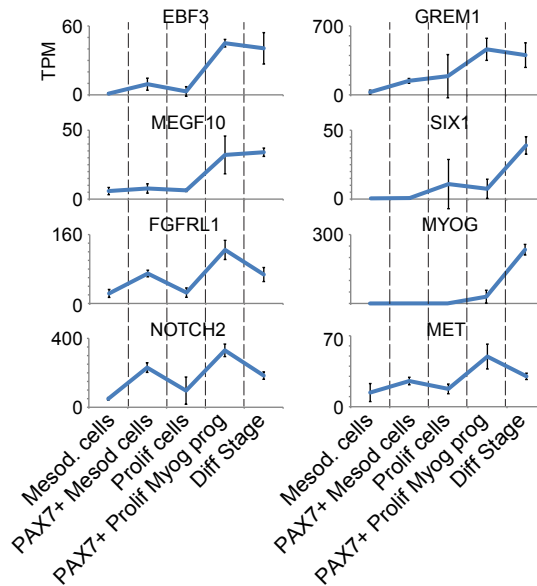
**C**
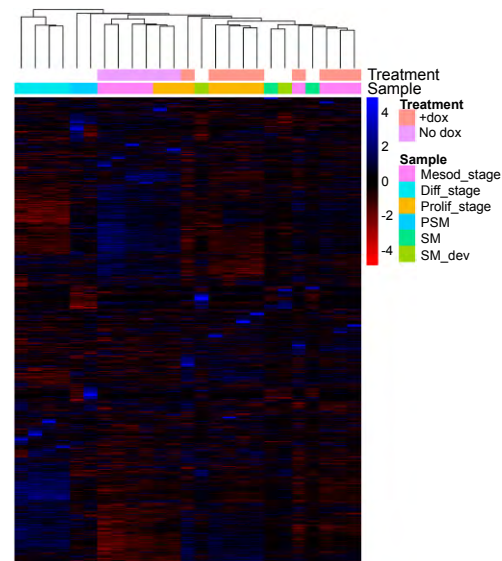
**D**
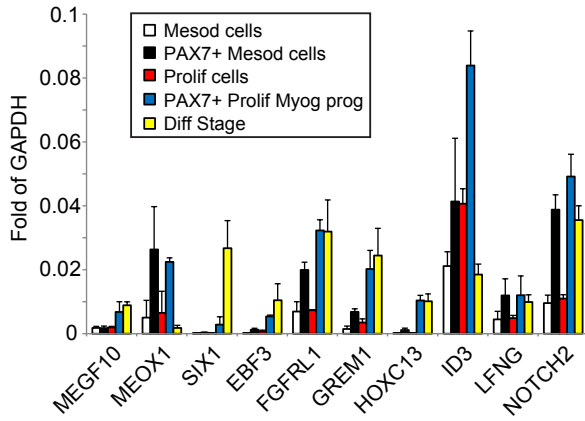
**F**
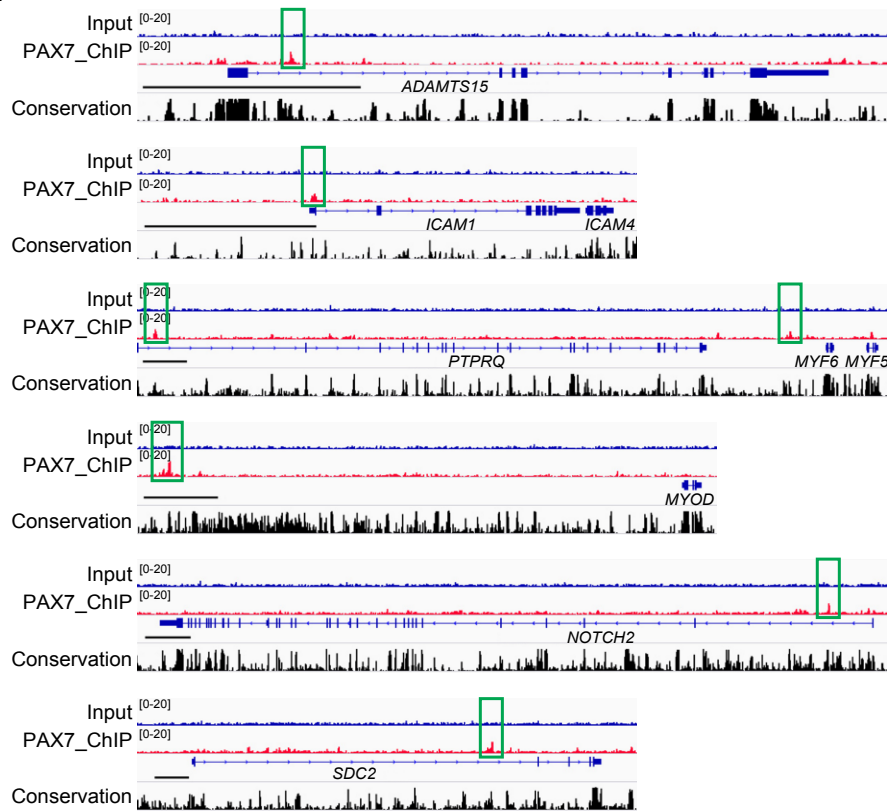
**E**
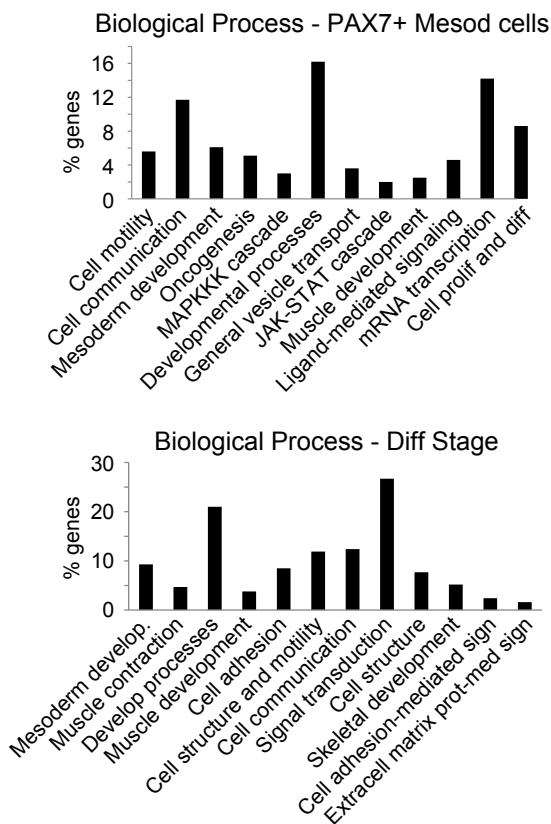
**G**

Gene type distribution of PAX7 peaks

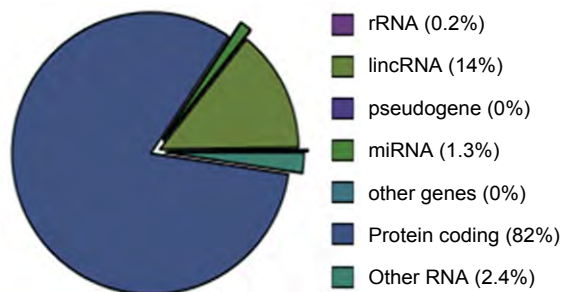

**Figure S1. Transcriptomic and genome occupancy profiling during PAX7-induced human skeletal myogenesis, Related to Figure 1.** (A) Spearman correlations map of sample vs sample. (B) Expression profiles of selected genes from RNA-seq. TPM: Transcripts Per Million. (C) Heat map representing global transcriptome comparison using Cufflinks between control, PAX7-induced differentiating human pluripotent stem cells and tissues isolated from human embryo (GEO data: GSE39613). PSM: presomitic mesoderm; SM: nascent somite; SM dev: developed somite. Expression values are expressed as FPKM (Fragments Per Kilobase of transcript per Million reads). (D) RT-qPCR validation of selected genes from RNA-seq. (E) Gene Ontology classification of up-regulated genes based on Biological Process. Histogram reports % genes on the y axis and categories ordered based on p value (ascending left to right) on the x axis. (F) Snapshot of tracks from the Integrative Genome Viewer (IGV) browser showing PAX7 peaks (green boxes) at the ADAMTS15, ICAM1, MYF5-MYF6-PTPRQ cluster, MYOD, NOTCH2 and SDC2 loci. Conservation (Phastcons scale 0-1). Bar: 10Kb. (G) Gene type distribution of PAX7 peaks following annotation using PAVIS web resource.

# Figure S2

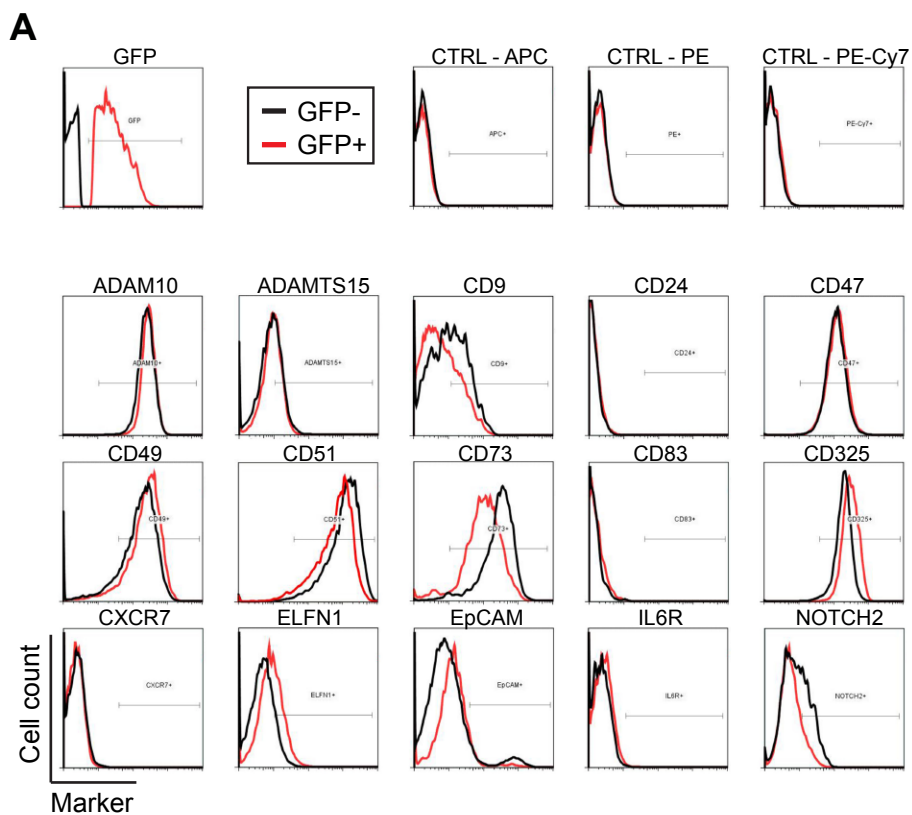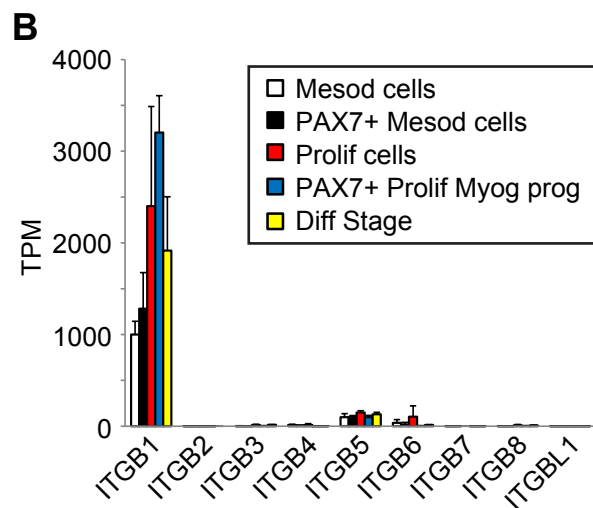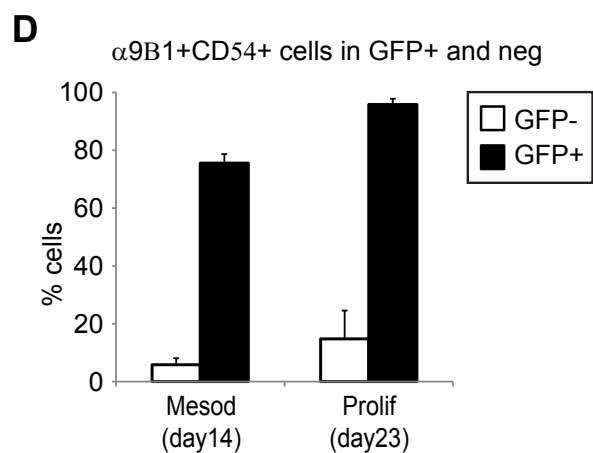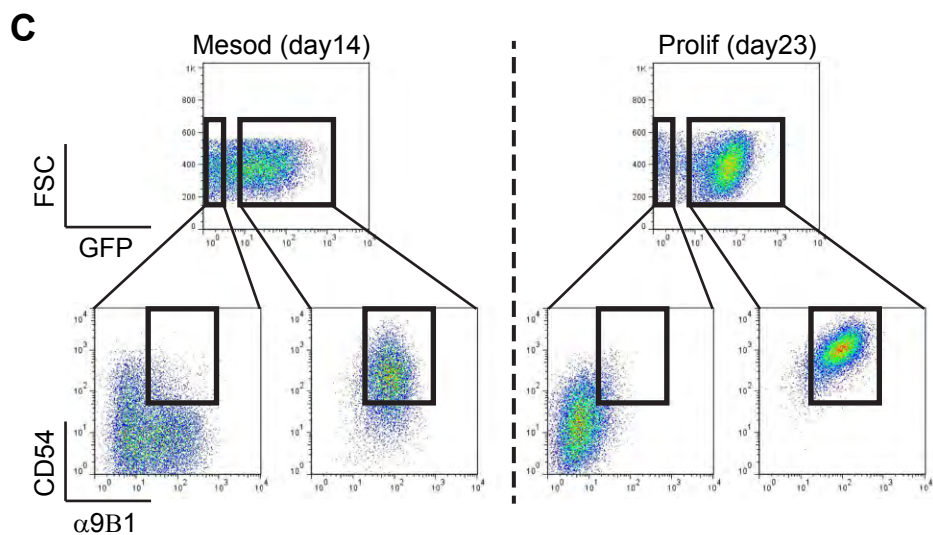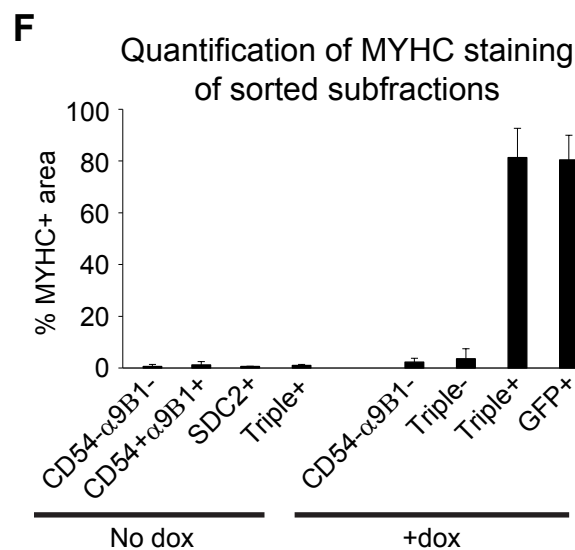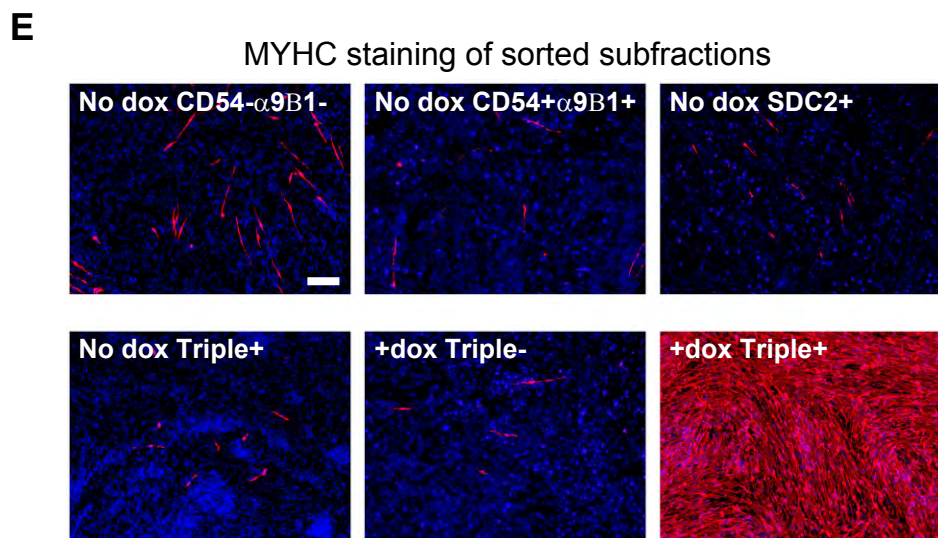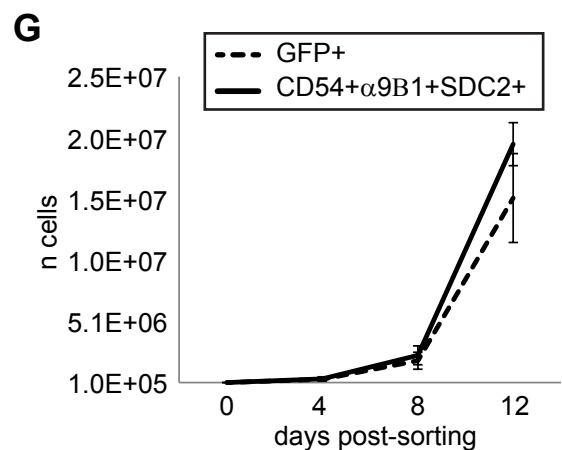

**Figure S2. Human pluripotent-derived myogenic progenitors express CD54,  $\alpha$ 9 $\beta$ 1 and SDC2, Related to Figure 2.** (A) Histograms from FACS analysis of differentiating pluripotent stem cells using the indicated antibodies. PAX7-expressing cells (GFP+; red line) are compared to control cells (GFP-; black line). (B) Expression profiles of beta integrin genes across all RNA-seq samples. (C) Representative FACS analysis of GFP+ and GFP- cells for CD54 and  $\alpha$ 9 $\beta$ 1 at day 14 of differentiation and proliferating myogenic progenitors following PAX7 induction. (D) Quantification of FACS data (n=5) from panel C. (E) Assessment of the myogenic potential of different FACS-sorted fractions following staining using CD54,  $\alpha$ 9 $\beta$ 1 and SDC2 antibodies. Representative immunostaining (n=4) for the skeletal myogenic differentiation marker MYHC (red) following terminal differentiation of uninduced (No dox) CD54- $\alpha$ 9 $\beta$ 1-, CD54+ $\alpha$ 9 $\beta$ 1+, SDC2+ and Triple+ as well as dox-treated (+dox) CD54- $\alpha$ 9 $\beta$ 1-SDC2- (Triple-) and Triple+ sorted cells. Nuclei: blue. Bar 100 $\mu$ m. (F) Quantification of myogenic potential of sorted subfractions (n=4) from panel E. (G) Growth curve analysis of GFP+ and CD54+ $\alpha$ 9 $\beta$ 1+SDC2+ sorted cells (n=4).



Figure S3

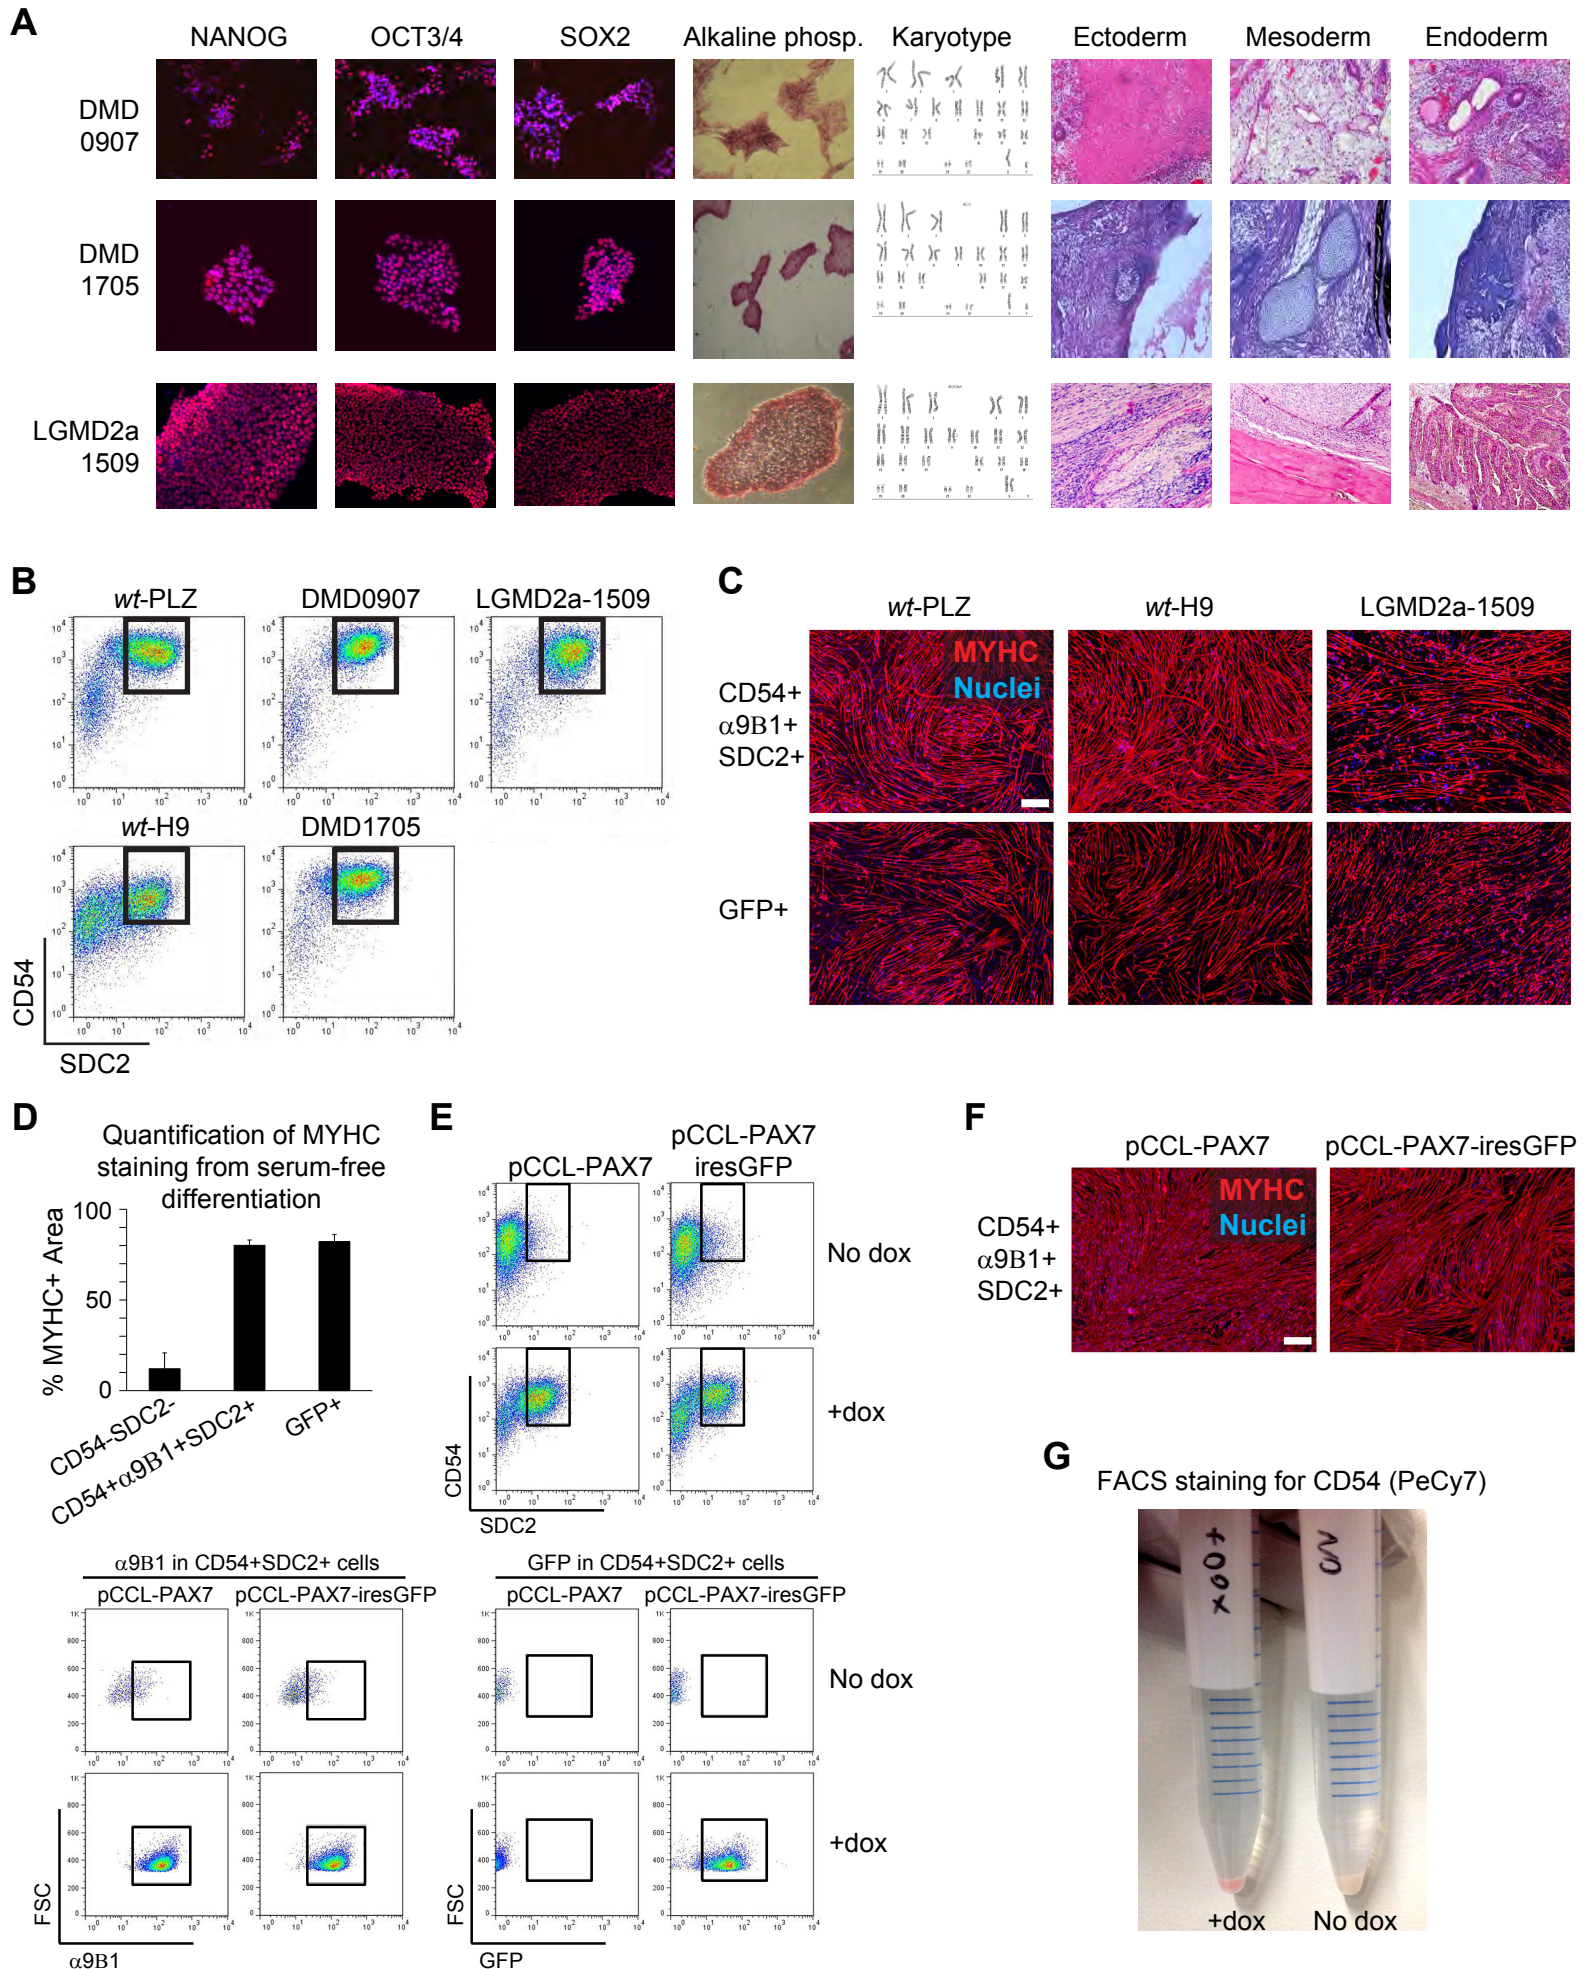

**Figure S3. CD54,  $\alpha 9\beta 1$ , SDC2 allow purification of myogenic progenitors from multiple cell lines, Related to Figures 2 and 3.** (A) Characterization of the DMD0907, DMD1705 and LGMD2a-1509 human iPS cells. Immunofluorescence for pluripotency markers NANOG, OCT3/4 and SOX2; Alkaline phosphatase activity; karyotype; teratoma formation. (B) FACS analysis of PAX7-induced cultures from differentiating WT-PLZ (*wt* human iPS cells) and WT-H9 (human ES cells) cell lines, DMD1705 and DMD0907 (DMD human iPS cells) and LGMD2a-1509 human iPS cells. (C) Representative immunostaining (n=3) for the skeletal myogenic differentiation marker MYHC (red) following isolation of CD54+ $\alpha 9\beta 1$ +SDC2+ and GFP+ cells from WT-PLZ, WT-H9 and LGMD2a-1509 cells. Nuclei: blue. Bar 100 $\mu$ m. (D) Quantification of myogenic potential of sorted subfractions (n=4) from differentiation in serum-free condition (panel C of Figure 3). (E) Representative FACS analysis of differentiating H9 cells (n=3) transduced with third generation lentiviral construct expressing PAX7 (pCCL-PAX7) or PAX7-ires-GFP (pCCL-PAX7-ires-GFP). Note the comparable expression pattern of CD54,  $\alpha 9\beta 1$  and SDC2 in dox-treated cultures from both cell lines, regardless of GFP expression. CD54,  $\alpha 9\beta 1$  and SDC2 are robustly up-regulated in the dox-group by PAX7. (F) Representative immunostaining (n=3) for the skeletal myogenic differentiation marker MYHC (red) following isolation of CD54+ $\alpha 9\beta 1$ +SDC2+ from H9 pCCL-PAX7 and H9 pCCL-PAX7-ires-GFP. Bar 100 $\mu$ m. (G) CD54 is highly upregulated following PAX7 (+dox) induction. Upon immunostaining using anti-CD54-biotin followed by incubation with Streptavidin-PeCy7, cell pellet from dox-treated cultures is visibly positive to CD54 compared to uninduced (no dox) cells.



Figure S4

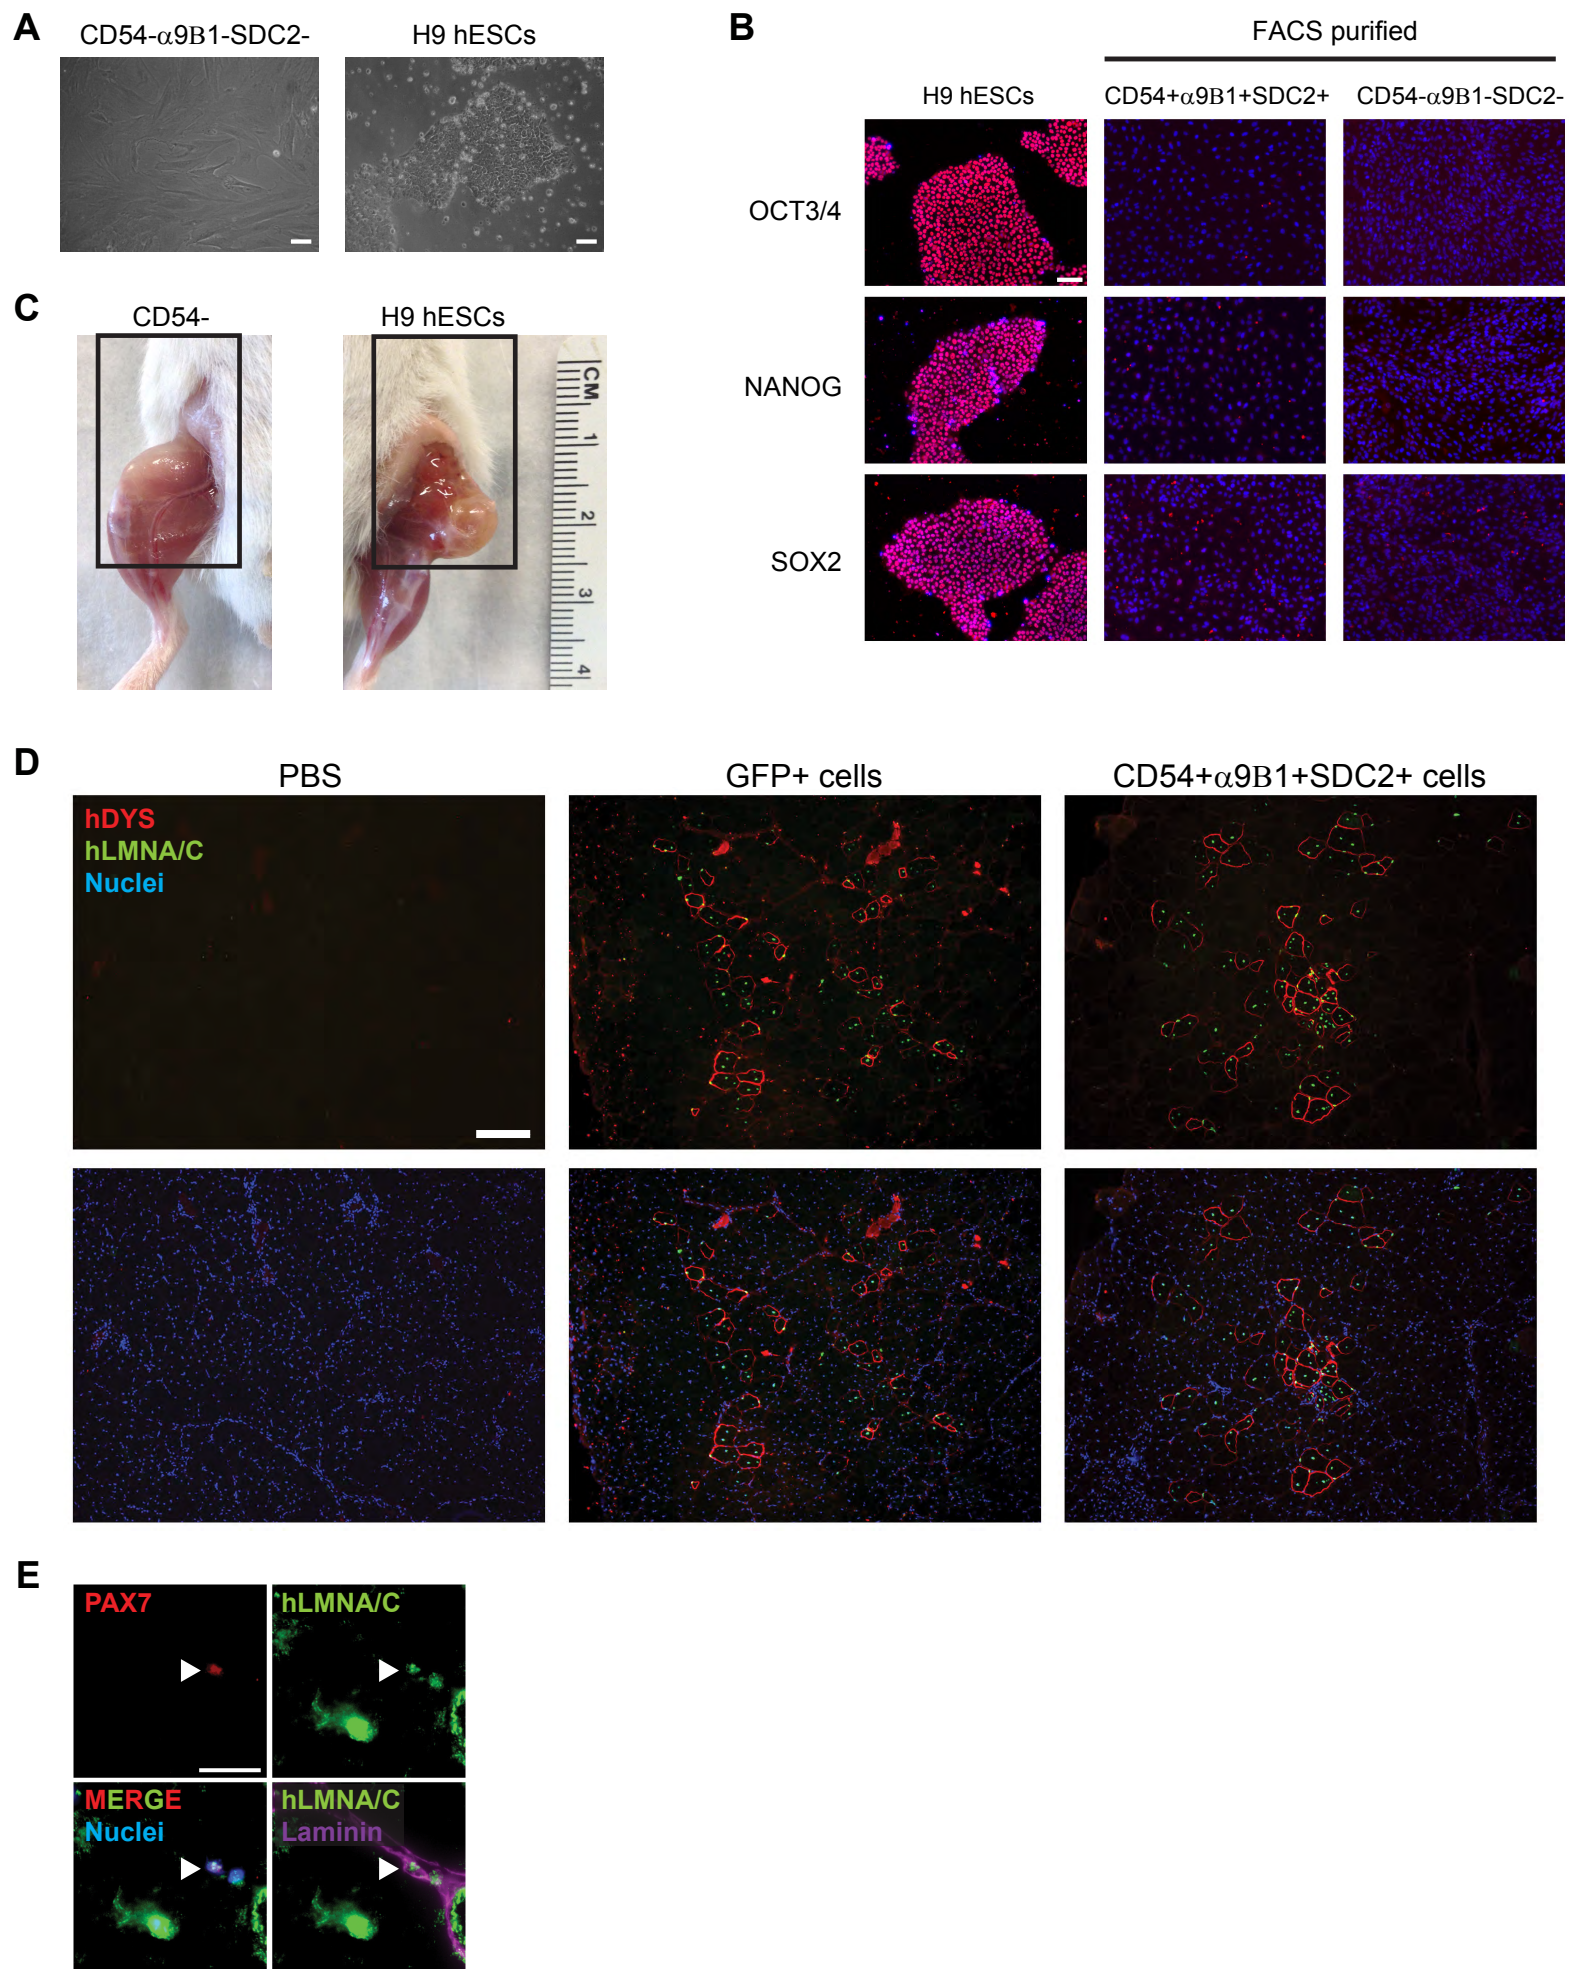



**Figure S4. Evaluation of safety and skeletal muscle regeneration potential of human pluripotent-derived myogenic progenitors, Related to Figures 3 and 4.** (A) Phase-contrast pictures of human ES cells (H9 hESC) and CD54- $\alpha$ 9 $\beta$ 1- sorted cells. CD54- $\alpha$ 9 $\beta$ 1- cells were isolated at the proliferation stage from PAX7-induced cultures. (B) Immunostaining for the pluripotency markers OCT3/4 (upper panels), NANOG (middle panels) and SOX2 (lower panels). For the analysis, CD54+ $\alpha$ 9 $\beta$ 1+SDC2+ and CD54- $\alpha$ 9 $\beta$ 1- sorted cells were compared to pluripotent cells (H9 hESCs) (n=3). Specific staining are shown in Red; Nuclei in blue. Bar 100 $\mu$ m. (C) Assessment of teratoma formation upon intramuscular injection of H9 ES cells (n=2, right) and CD54- FACS sorted cells (n=4, left). Both CD54- and CD54+ cells (n=4, data not shown) gave no visible sign of teratoma. (D) Representative immunostaining of cryosections from PBS-injected or GFP+ sorted and CD54+ $\alpha$ 9 $\beta$ 1+SDC2+ cell-transplanted muscles (n=4) using human-specific antibodies for DYSTROPHIN (red) and LAMIN A/C (green). Nuclei (blue). Bar 100 $\mu$ m. (E) Representative immunostaining of cryosections from CD54+ $\alpha$ 9 $\beta$ 1+SDC2+ cell-transplanted muscles (n=4) using antibodies for Pax7 (red), human-specific LAMIN A/C (green) and Laminin  $\alpha$ -2 (Violet). Nuclei (blue). Arrowhead indicates a donor derived satellite cell. Bar 20 $\mu$ m.

## II. SUPPLEMENTAL EXPERIMENTAL PROCEDURES

FACS analysis, sorting and MACS. Cultures from day 14 or day 23 (proliferating myogenic progenitors) were washed once with PBS and then harvested using Enzyme-free cell dissociation buffer (Gibco) for ~10 min at 37°C followed by gentle resuspension with pipette. Cells were collected, centrifuged, washed with PBS and filtered through a 70µm strain to remove cell clumps. Cell pellets were then resuspended in PBS supplemented with 10% FBS (PBSF) in the presence of Fc Block (1µl/million cells – BD bioscience) and incubated for 5 minutes. Staining was performed by adding 1µl of antibody/million cells followed by 20 min incubation on ice. For biotin-conjugated primary antibodies, samples were washed once with PBS then followed by 5 min incubation with PE-Cy7 conjugated Streptavidin (0.5µl/million cells diluted in PBSF). Cells were washed with PBS and then resuspended in PBSF containing propidium iodide to exclude dead cells. Samples were analyzed and sorted using a FACS Aria II (BD Biosciences). For MACS purification, cells were collected and processed as described above and stained using Biotin-conjugated anti-CD54 antibody followed by incubation with Streptavidin-conjugated microbeads (Miltenyi) following the manufacturer's instructions. Magnetic cell separation was performed on MS columns (Miltenyi).

Antibodies used for FACS:

| <b>Antibody - FACS</b>                            | <b>Manufacturer</b> | <b>Catalog number</b> |
|---------------------------------------------------|---------------------|-----------------------|
| Streptavidin PE-Cyanine7                          | eBioscience         | 25-4317-82            |
| PE anti-human Integrin $\alpha 9\beta 1$ Antibody | BioLegend           | 351605                |
| APC anti-human CD156c (ADAM10) Antibody           | BioLegend           | 352705                |
| Human ADAMTS15 MAb (Clone 561819)                 | R&D systems         | MAB5149               |
| Anti-Human CD9 PE                                 | eBioscience         | 12-0098-41            |
| Anti-Human CD24 PE-Cyanine7                       | eBioscience         | 25-0247-41            |
| Anti-Human CD47 APC                               | eBioscience         | 17-0479-41            |
| Anti-Human CD49e (Integrin alpha 5) Biotin        | eBioscience         | 13-0496-80            |
| Biotin anti-human CD51 Antibody                   | BioLegend           | 327906                |

|                                                |                     |            |
|------------------------------------------------|---------------------|------------|
| Anti-Human CD54 (ICAM-1) APC                   | eBioscience         | 17-0549-41 |
| Anti-Human CD54 (ICAM-1) Biotin                | eBioscience         | 13-0549-82 |
| APC anti-human CD73                            | eBioscience         | 17-0739-41 |
| Anti-Human CD83 PE-Cyanine7                    | eBioscience         | 25-0839-41 |
| PE/Cy7 anti-human CD325 (N-Cadherin) Antibody  | BioLegend           | 350811     |
| Biotin anti-human/mouse CXCR7 Antibody         | BioLegend           | 331111     |
| ELFN1 Antibody (N-12)                          | Santa Cruz Biotech. | sc-136660  |
| Anti-Human CD326 (EpCAM) PE-Cyanine7           | eBioscience         | 25-9326-41 |
| PE anti-IL-6R alpha antibody                   | BD Biosciences      | 561696     |
| Anti-Human/Mouse Notch2 PE                     | eBioscience         | 12-5786-80 |
| Human Syndecan-2/CD362 APC-conjugated Antibody | R&D systems         | FAB2965A   |

RNA isolation, library preparation and sequencing. Cells were resuspended in Trizol (Invitrogen) and purified using the Purelink RNA mini kit (Life Technologies) following the manufacturer's instructions. DNase treatment was performed on column during the RNA isolation procedure. RNAs were retro-transcribed using Superscript Vilo (Invitrogen). Gene expression analyses were performed using an amount of cDNA solution corresponding to 12.5 ng of starting RNA for each reaction. RT-qPCR analysis was performed using TaqMan Universal PCR Master Mix and TaqMan probes (Applied Biosystems).

Sequencing libraries were generated from 100 ng of total RNA using the Ligation Mediated Sequencing (LM-Seq) protocol (Hou et al., 2015) quantitated using the Qubit fluorometer (Life Technologies) following the author's instructions. The libraries were then pooled using 13 ng/sample for a 51+10 cycle Single Read run on the HiSeq 2500 (Illumina) by high output sequencing. The sequencer outputs were processed using Illumina's CASAVA-1.8.2 basecalling software. Demultiplexing assigned ~170 million reads across the 19 samples, ranging from 7 million to 11 million reads per sample. Of the assigned reads, about 1 million were discarded for low quality or the presence of sequencing adaptors in the reads.

Transcriptome analysis. Each sample's reads were then processed using RSEM version 1.2.3 (with bowtie-0.12.9 for the alignment step) (Langmead et al., 2009; Li and Dewey, 2011).

Percentage of reads mapped to the transcriptome ranged from 53% to 65%. Genes were filtered to select only those with median-normalized TPM (Transcripts Per Million reads) greater than 64 in at least one sample, and a fold change greater than 4 between the median-normalized Expected Counts (EC) of any two samples. Heat map of relative expression (displayed in Figure 1B) display for each gene G and sample S the value  $\log_2 \left( \frac{1 + \text{median-normalized EC}(G,S)}{1 + \text{mean over all } S_i \text{ median-normalized EC}(G, S_i)} \right)$ . Data were uploaded in NCBI Gene Expression Omnibus and are available at the accession number GSE98976.

Raw sequences were also analyzed using a customized pipeline (gopher-pipelines; <https://bitbucket.org/jgarbe/gopher-pipelines/overview>) developed and maintained by the Minnesota Supercomputing Institute (MSI). Briefly, quality controls were performed on each FASTQ files using FastQC (version 0.11.5) before and after adapter trimming with Trimmomatic (version 0.33) (Bolger et al., 2014). Between 7,105,374 to 10,951,120 reads (mean 8,929,324) passed filtering. Post-trimming sequences were aligned to GRCh38/hg38 reference genome using HISAT2 (version 2.0.2) (Kim et al., 2015). FPKM values were then generated using Cufflinks (version 2.2.1) (Trapnell et al., 2012).

Public data: RNA-seq data of developing human paraxial mesoderm from 4.5-5 weeks of gestation human embryos were downloaded from NCBI Gene Expression Omnibus (GSE90876). Sequence analysis was performed using the same method described above. Between 11,735,971 to 16,786,367 reads (mean 13,745,343) were generated per library and the average quality score passing quality filter were Q39. After adapter trimming, between 11,699,048 to 16,732,983 reads (mean 13,705,360) passed filtering.

Heat map (relative to Figure S1C): FPKM values were used to generate heat maps in R (version 3.2.3) using *pheatmap* (version 1.0.8) package. Briefly, FPKM values of the two datasets were



filtered independently to include transcripts with FPKM  $\geq 1$  in at least 10% of the samples. The FPKM values of the union of transcripts (21,918) were then log<sub>2</sub> transformed and mean centered within each dataset. Then the two datasets were combined to generate heat maps. Hierarchical clustering was performed using euclidean distances and average linkage clustering method.

Chromatin-immunoprecipitation, library generation, sequencing and data analysis. Chromatin-immunoprecipitation was performed following the protocol described by Young and colleagues (Boyer et al., 2005) with minor modifications. Briefly, day 23 Proliferating Myogenic progenitors (+dox) were collected using trypsin and reaction was inhibited by adding 10%FBS/PBS. Single cells were washed once with PBS, resuspended in 10%FBS/PBS and supplemented with formaldehyde (final concentration 1%) for crosslinking of protein-DNA complexes (10 minutes at RT) followed by quenching with glycine. Cells were snap-frozen in liquid nitrogen and stored at -80°C if not processed immediately. Cell pellets were incubated in lysis buffer LB1 supplemented with protease inhibitors (50mM HEPES KOH pH7.5, 140mM NaCl, 1mM EDTA, 10% glycerol, 0.5% NP40, 0.25% Triton X-100 + Complete-mini - Roche) for 10 minutes at +4°C followed by incubation in buffer LB2 supplemented with protease inhibitors (10mM TRIS HCl pH 8, 200mM NaCl, 1mM EDTA, 0.5mM EGTA + Complete-mini - Roche) for 10 minutes at +4°C. Cell pellet was then resuspended in LB3 supplemented with protease inhibitors (10mM TRIS HCl pH 8, 100mM NaCl, 1mM EDTA, 0.5mM EGTA, 0.1% Sodium Deoxycholate, 0.5% N-lauroylsarcosine + Complete-mini - Roche) and then sonicated with a Branson sonicator at 18% power for 1 minute with intervals of 10 sec ON-10 sec OFF. Each sample was subjected to 5-6 cycles of sonication to reach an average chromatin size of 300bp. After shearing, samples were centrifuged for 10 minutes at 16000g and snap frozen in liquid nitrogen if not processed immediately. For each ChIP, 20µg of chromatin (diluted to

400µl) were precleared for 4h at 4°C with 15µl of BSA-blocked Protein G-conjugated sepharose beads (GE healthcare) and then supplemented with 1/10 volume of 10% Triton X-100. Immunoprecipitation was performed by overnight incubation with normal mouse IgG (8µg – Santa Cruz Biotechnology) or anti-Pax7 antibody (1:50 – Developmental Studies Hybridoma Bank). Immune complexes were recovered by incubation with 15µl of BSA-blocked Protein G-conjugated sepharose beads for 4h at 4°C and then washed 5 times with RIPA wash buffer (50mM HEPES KOH pH7.5, 500mM LiCl, 1mM EDTA, 1% NP40, 0.25% Triton X-100, 0.7% Sodium Deoxycholate) and one time with TEN buffer (10mM TRIS HCl pH 8, 1mM EDTA, 50mM NaCl). Immunoprecipitated chromatin was recovered by incubating beads with 200µl of Elution buffer (50mM TRIS HCl pH 8, 10mM EDTA, 1% Sodium Dodecyl Sulfate) for 20 minutes at 65°C. Chromatin from IP and Input (equivalent to 1% of starting material) was reverse crosslinked overnight at 65°C, then diluted 1:1 with TE (10mM TRIS HCl pH 8, 1mM EDTA) supplemented with 4µl of RNaseA 20mg/ml and incubated for 2 hours at 37°C followed by Proteinase K treatment (4µl of 20mg/ml stock for each sample) for 30 minutes at 55°C. DNA was purified by Phenol-chloroform-isoamyl alcohol extraction (twice) followed by chloroform extraction, then supplemented with 1/10 of volume of 3M Sodium Acetate pH 5 and 1.5µl of Glycogen and precipitated with 2 volumes of 100% Ethanol at -80°C for >1 hour. Followed 30 minutes centrifuge at 16000g, pellet were washed with 75% ethanol, air dried and dissolved in 45µl H<sub>2</sub>O.

Libraries were generated following a gel-free protocol using AMPure XP beads (Beckman Coulter) for all the purification and size selection steps. 10ng or less of DNA were end repaired using End-it DNA end repair (Epicentre), then A-tailed using Klenow Fragment (3'→5' exo-NEB) followed by adapter-barcode ligation using T4 DNA ligase (Enzymatics). Illumina

compatible adapter-barcode were purchased from BIOO scientific. After ligation, DNAs were negatively size selected using 0.5x Ampure XP beads and unbound DNAs were positively size selected by adding 0.4x Ampure XP beads (this step allows for retention of DNA fragments ranging 200-500bp). Libraries were amplified using Phusion High Fidelity PCR master mix 2x (NEB) with a 16 cycles program. Purified libraries were then submitted to the University of Minnesota Genomic Center (UMGC) for quantification, quality control and sequencing. Libraries were pooled and sequenced on a lane of Single-End run on a HiSeq2500 operated at High Output mode (Illumina). The sequencer outputs were processed using the Galaxy platform (Goecks et al., 2010) available at the Minnesota Supercomputing Institute (MSI). Demultiplexing assigned ~60 million reads across the 2 samples (~30 million reads per sample). Each sample's reads were then aligned to the human genome (hg38) using Bowtie2 (Langmead and Salzberg, 2012) followed by removal of PCR duplicates using the SAM tool rmdup 1.0.1 (Li et al., 2009). Peak calling was performed using MACS 1.0.1 (Zhang et al., 2008) (parameters: -s 51 -bw 300, -p 1e-05 -m 16). Bigwig files for visualization on IGV (Thorvaldsdottir et al., 2013) were generated by converting the wig files obtained from MACS using the Galaxy tool Wig-to-BigWig. Motif analysis was performed using the SeqPos tool (Liu et al., 2011). For this analysis the Top 3000 PAX7 peaks (based on the MACS score) were filtered to exclude regions overlapping peaks detected in the Input and the human blacklist dataset (Consortium, 2012). Annotation of PAX7 peaks was performed using the web resource PAVIS (Huang et al., 2013). Data were uploaded in NCBI Gene Expression Omnibus and are available at the accession number GSE98976.

Immunostaining. Cultured cells were fixed with 4% PFA for 10 min at +4°C followed by permeabilization with 0.1% Triton in PBS for 10 min at RT. After PBS wash, cells were blocked

for 30 min at RT with 3% BSA in PBS and then incubated with primary antibodies diluted in blocking solution overnight at +4°C. Cells were then washed and incubated with secondary antibody diluted in blocking solution supplemented with DAPI for 1 hour at RT. After PBS washes, cells were maintained in PBS until final analysis. Pictures were acquired using an inverted fluorescence microscope (Zeiss). Tissue cryosections were permeabilized with 0.3% Triton X-100 in PBS for 20 min at RT, then blocked and incubated with primary antibodies overnight as described. Sections were then washed and incubated with secondary antibodies as described for cells. Antibodies: Myosin Heavy Chain (clone MF20 – Developmental Studies Hybridoma Bank); human specific Lamin A/C (Abcam); human specific Dystrophin (EMD Millipore); M-cadherin (BD Biosciences), Pax7 (Developmental Studies Hybridoma Bank), OCT3/4, NANOG, SOX2 and Laminin  $\alpha$ -2 (all from Santa Cruz Biotechnology); Alexa-555 goat anti-mouse, Alexa-488 goat anti-rabbit and Alexa-647 goat anti-rat (Thermo Fisher). Antibodies used for Immunostaining and Chromatin-immunoprecipitation.

| <b>Antibody</b>                         | <b>Manufacturer</b> | <b>Catalog number</b> |
|-----------------------------------------|---------------------|-----------------------|
| Myosin Heavy Chain                      | DSHB                | Clone MF20            |
| Pax7                                    | DSHB                | Clone Pax7            |
| Human Dystrophin, clone 2C6 (MANDYS106) | EMD                 | MABT827               |
| Human Lamin A + C antibody [EPR4100]    | Abcam               | ab108595              |
| M-cadherin                              | BD Biosciences      | 611101                |
| Laminin $\alpha$ -2 (4H8-2)             | Santa Cruz Biotech. | sc-59854              |
| OCT3-4                                  | Santa Cruz Biotech. | sc-5279               |
| NANOG                                   | Santa Cruz Biotech. | sc-374103             |
| SOX2                                    | Santa Cruz Biotech. | sc-17320              |
| Alexa-555 goat anti-mouse               | ThermoFisher        | A-21424               |
| Alexa-488 goat anti-rabbit              | ThermoFisher        | A-11008               |
| Alexa-647 goat anti-rat                 | ThermoFisher        | A-11006               |

Quantification and Statistical Analysis. Analyses were performed using the ImageJ distribution Fiji (Schindelin et al., 2012). Quantification of *in vivo* engraftment was performed by counting the number of hLMNA-C positive fibers in 4 representative pictures for each transplanted mouse



using the plugin *Cell counter*. Data represent mean+standard error of n= 3 independent transplanted muscles. Analysis of myogenic differentiation potential of sorted subfractions was performed as follow: color channels were separated and threshold level for the red and blue channels were adjusted in order to select the area positive respectively to MYHC (red) and DAPI (blue). The area positive for each channel was analyzed using *Analyze Particle* using 0-Infinity as Size parameter. Finally, the percentage of MYHC+ area for each image was normalized based on nuclear staining (DAPI+). Data represent mean  $\pm$  standard deviation of at least 2 representative pictures for each independent experiments (n=3).

### III. ASSOCIATED REFERENCES

- Bolger, A.M., Lohse, M., and Usadel, B. (2014). Trimmomatic: a flexible trimmer for Illumina sequence data. *Bioinformatics* 30, 2114-2120.
- Boyer, L.A., Lee, T.I., Cole, M.F., Johnstone, S.E., Levine, S.S., Zucker, J.P., Guenther, M.G., Kumar, R.M., Murray, H.L., Jenner, R.G., *et al.* (2005). Core transcriptional regulatory circuitry in human embryonic stem cells. *Cell* 122, 947-956.
- Consortium, E.P. (2012). An integrated encyclopedia of DNA elements in the human genome. *Nature* 489, 57-74.
- Goecks, J., Nekrutenko, A., Taylor, J., and Galaxy, T. (2010). Galaxy: a comprehensive approach for supporting accessible, reproducible, and transparent computational research in the life sciences. *Genome Biol* 11, R86.
- Hou, Z., Jiang, P., Swanson, S.A., Elwell, A.L., Nguyen, B.K., Bolin, J.M., Stewart, R., and Thomson, J.A. (2015). A cost-effective RNA sequencing protocol for large-scale gene expression studies. *Sci Rep* 5, 9570.
- Huang, W., Loganantharaj, R., Schroeder, B., Fargo, D., and Li, L. (2013). PAVIS: a tool for Peak Annotation and Visualization. *Bioinformatics* 29, 3097-3099.
- Kim, D., Langmead, B., and Salzberg, S.L. (2015). HISAT: a fast spliced aligner with low memory requirements. *Nat Methods* 12, 357-360.
- Langmead, B., and Salzberg, S.L. (2012). Fast gapped-read alignment with Bowtie 2. *Nat Methods* 9, 357-359.
- Langmead, B., Trapnell, C., Pop, M., and Salzberg, S.L. (2009). Ultrafast and memory-efficient alignment of short DNA sequences to the human genome. *Genome Biol* 10, R25.
- Li, B., and Dewey, C.N. (2011). RSEM: accurate transcript quantification from RNA-Seq data with or without a reference genome. *BMC Bioinformatics* 12, 323.
- Li, H., Handsaker, B., Wysoker, A., Fennell, T., Ruan, J., Homer, N., Marth, G., Abecasis, G., Durbin, R., and Genome Project Data Processing, S. (2009). The Sequence Alignment/Map format and SAMtools. *Bioinformatics* 25, 2078-2079.
- Liu, T., Ortiz, J.A., Taing, L., Meyer, C.A., Lee, B., Zhang, Y., Shin, H., Wong, S.S., Ma, J., Lei, Y., *et al.* (2011). Cistrome: an integrative platform for transcriptional regulation studies. *Genome Biol* 12, R83.
- Schindelin, J., Arganda-Carreras, I., Frise, E., Kaynig, V., Longair, M., Pietzsch, T., Preibisch, S., Rueden, C., Saalfeld, S., Schmid, B., *et al.* (2012). Fiji: an open-source platform for biological-image analysis. *Nat Methods* 9, 676-682.
- Thorvaldsdottir, H., Robinson, J.T., and Mesirov, J.P. (2013). Integrative Genomics Viewer (IGV): high-performance genomics data visualization and exploration. *Brief Bioinform* 14, 178-192.
- Trapnell, C., Roberts, A., Goff, L., Pertea, G., Kim, D., Kelley, D.R., Pimentel, H., Salzberg, S.L., Rinn, J.L., and Pachter, L. (2012). Differential gene and transcript expression analysis of RNA-seq experiments with TopHat and Cufflinks. *Nat Protoc* 7, 562-578.
- Zhang, Y., Liu, T., Meyer, C.A., Eeckhoute, J., Johnson, D.S., Bernstein, B.E., Nusbaum, C., Myers, R.M., Brown, M., Li, W., *et al.* (2008). Model-based analysis of ChIP-Seq (MACS). *Genome Biol* 9, R137.

**IV. Table S2. Genes in BP00124: Cell adhesion (From DAVID bioinformatics), Related to Figure 1.**

List of genes associated with cell adhesion, which were found up-regulated following PAX7 induction in PAX7+ proliferating myogenic progenitors.

| <b>GENE_SYMBOL</b> | <b>GENE_NAME</b>                                                          |
|--------------------|---------------------------------------------------------------------------|
| ASAP1              | ArfGAP with SH3 domain, ankyrin repeat and PH domain 1                    |
| CD151              | CD151 molecule (Raph blood group)                                         |
| CD47               | CD47 molecule                                                             |
| CDON               | Cdon homolog (mouse)                                                      |
| FAT1               | FAT tumor suppressor homolog 1 (Drosophila)                               |
| FAT4               | FAT tumor suppressor homolog 4 (Drosophila)                               |
| GIT2               | G protein-coupled receptor kinase interacting ArfGAP 2                    |
| ARHGEF12           | Rho guanine nucleotide exchange factor (GEF) 12                           |
| ROCK2              | Rho-associated, coiled-coil containing protein kinase 2                   |
| ARVCF              | armadillo repeat gene deletes in velocardiofacial syndrome                |
| ATRNL1             | attractin-like 1                                                          |
| CDH15              | cadherin 15, type 1, M-cadherin (myotubule)                               |
| CDH2               | cadherin 2, type 1, N-cadherin (neuronal)                                 |
| CLSTN3             | calsyntenin 3                                                             |
| CERCAM             | cerebral endothelial cell adhesion molecule                               |
| COL2A1             | collagen, type II, alpha 1                                                |
| COL4A2             | collagen, type IV, alpha 2                                                |
| COL5A2             | collagen, type V, alpha 2                                                 |
| GPC1               | glypican 1                                                                |
| GPC4               | glypican 4                                                                |
| HSPG2              | heparan sulfate proteoglycan 2                                            |
| ITGA1              | integrin, alpha 1                                                         |
| ITGA5              | integrin, alpha 5 (fibronectin receptor, alpha polypeptide)               |
| ITGAV              | integrin, alpha V (vitronectin receptor, alpha polypeptide, antigen CD51) |
| ICAM1              | intercellular adhesion molecule 1                                         |
| JAM2               | junctional adhesion molecule 2                                            |
| KIRREL             | kin of IRRE like (Drosophila)                                             |
| LAMA4              | laminin, alpha 4                                                          |
| LRRC4B             | leucine rich repeat containing 4B                                         |
| LOX                | lysyl oxidase                                                             |
| LOXL1              | lysyl oxidase-like 1                                                      |
| LOXL2              | lysyl oxidase-like 2                                                      |
| MXRA5              | matrix-remodelling associated 5                                           |
| MAGED1             | melanoma antigen family D, 1                                              |
| MAGED2             | melanoma antigen family D, 2                                              |

|          |                                                                                                                                                    |
|----------|----------------------------------------------------------------------------------------------------------------------------------------------------|
| NCAM1    | neural cell adhesion molecule 1                                                                                                                    |
| NRCAM    | neuronal cell adhesion molecule                                                                                                                    |
| NID1     | nidogen 1                                                                                                                                          |
| PCDH7    | protocadherin 7                                                                                                                                    |
| PCDHA10  | protocadherin alpha 13; protocadherin alpha 10; protocadherin alpha subfamily C, 1;<br>protocadherin alpha subfamily C, 2                          |
| PCDHB2   | protocadherin beta 2                                                                                                                               |
| PCDHGA11 | protocadherin gamma subfamily A, 11                                                                                                                |
| PCDHGB4  | protocadherin gamma subfamily B, 4                                                                                                                 |
| PCDHGB7  | protocadherin gamma subfamily B, 7                                                                                                                 |
| PCDHGC3  | protocadherin gamma subfamily C, 3; protocadherin gamma subfamily C, 5;<br>protocadherin gamma subfamily C, 4; protocadherin gamma subfamily A, 12 |
| SDC2     | syndecan 2                                                                                                                                         |
| SDC3     | syndecan 3                                                                                                                                         |
| TNS3     | tensin 3                                                                                                                                           |
| TSPAN9   | tetraspanin 9                                                                                                                                      |
| TRO      | trophinin                                                                                                                                          |
